# Supplementary material
Source: publisher site journal article supplement (https://www.dovepress.com/article/526204)
Supplement: Supplementary file 1 [file 526204%20SupplementaryMaterial_1.docx]

**Supplementary Table 1:** Post hoc power analyses for significant IOP and RNFLT outcomes in the HU group

| **Outcome** | **Comparison** | **Power (%)** | | | **Method** |
| --- | --- | --- | --- | --- | --- |
| **Right Eye** | | **Left Eye** |
| **IOP** | Day 0 vs Day 14 | 86.4 | | 76.7 | Paired t-test |
| Day 0-14 Spline | 65.2 (CI: 60.8–69.4) | | 75.0 (CI: 71.0–78.8) | Simulation-based power analysis |
| Day 14-35 Spline | 71.2 (CI: 67.0–75.1) | | 84.0 (CI: 80.49–87.1) | Simulation-based power analysis |
| **RNFLT** |  | **Peripapillary** | **Peripheral** | NS | Paired t-test |
| Day 0 vs Day 7 | 74.5 | NS | Paired t-test |
| Day 0 vs Day 14 | 93.7 | 65.3 | Paired t-test |
| Day 0 vs Day 21 | 88.2 | 81.1 | Paired t-test |
| Day 0 vs Day 28 | 99.8 | 88.2 | Paired t-test |
| Day 0 vs Day 35 | 87.4 | 80.8 | Paired t-test |

Notes: Paired t-tests were performed using the pwr package (version 1.3.0)1 and simulation-based power analyses were performed using the simr package (version 1.0.7)2 with 500 simulations per test.

Abbreviations: CI, confidence interval; NS, not significant

References:

1. Champely S. pwr: Basic Functions for Power Analysis. Published online 2020:1.3-0. doi:10.32614/CRAN.package.pwr

2. Green P, MacLeod CJ. SIMR: an R package for power analysis of generalized linear mixed models by simulation. *Methods in Ecology and Evolution*. 2016;7(4):493-498. doi:10.1111/2041-210X.12504
